# Supplementary material for: Overcoming blood–brain barrier by HER2-targeted nanosystem to suppress glioblastoma cell migration, invasion and tumor growth
Source: Royal Society of Chemistry journal article supplement (doi:10.1039/c7tb02677c), 2017-12-19
Supplement: c7tb02677c1.pdf [file c7tb02677c1.pdf]

## SUPPLEMENTARY INFORMATION

For

### Overcoming Blood-Brain Barrier by HER2-Targeted Nanosystem to Suppresses Glioblastoma Cell Migration, Invasion and Tumor Growth

#### Results

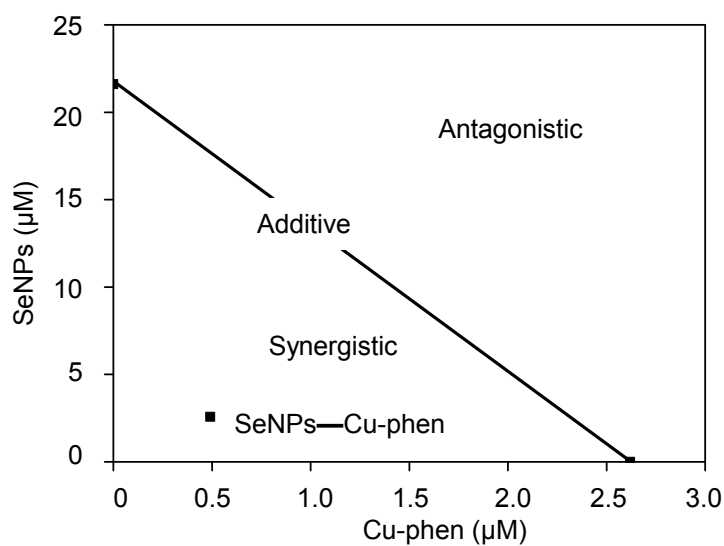

**Figure S1.** Isobologram analysis of the antiproliferative effects of SeNPs and Cu-phen on U251 cells

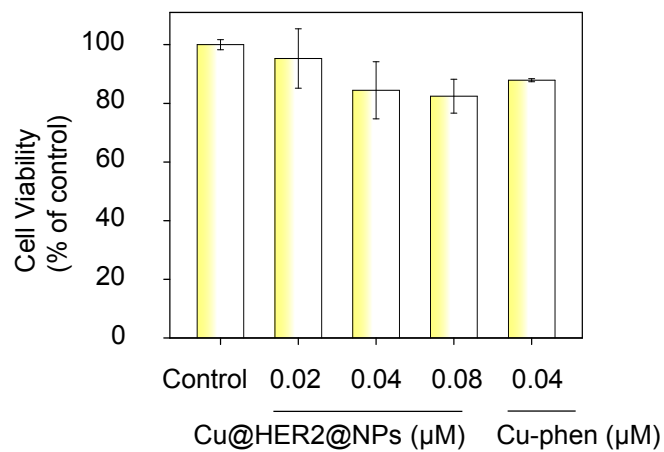

**Figure S2.** The U251 cells were exposed to the indicated concentration of Cu@HER2@NPs and Cu-phen for 24 h and then examined by MTT assay. All results were obtained from three independent experiments.

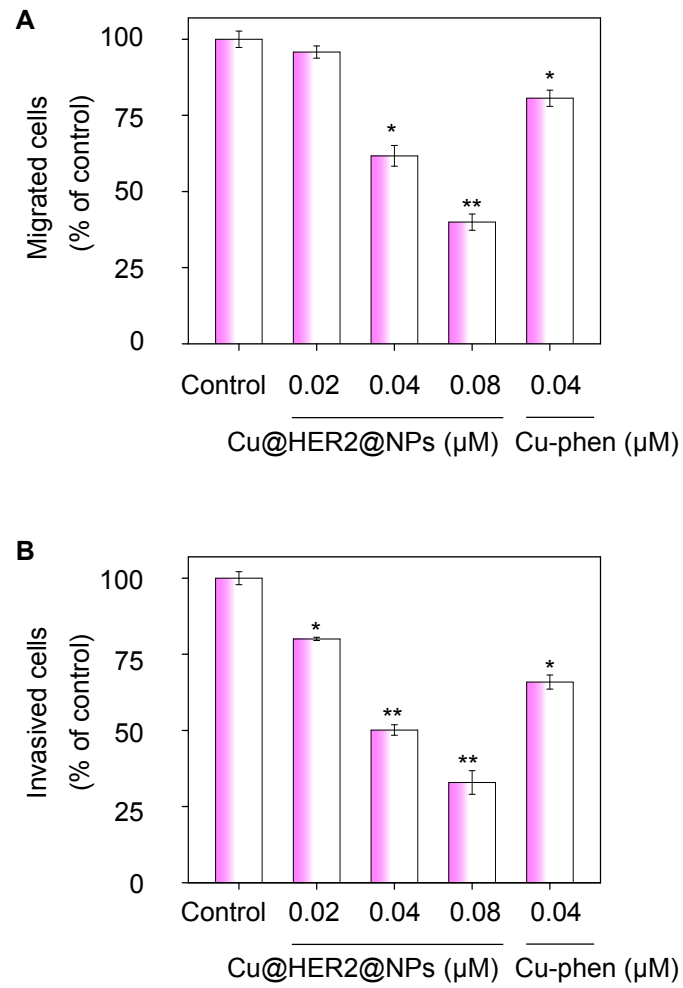

**Figure S3.** The migration cells (A) and invasion cells (B) after incubation with 0.02, 0.04, 0.08  $\mu\text{M}$  Cu@HER2@NPs and 0.04  $\mu\text{M}$  Cu-phen for 24 h. The quantitative data were analyzed by ImageJ and manual counting (% of control), respectively. Significant difference between treatment and control groups is indicated at \* $P < 0.05$  and \*\* $P < 0.01$  level. Each value represents means  $\pm$  SD (n=3).

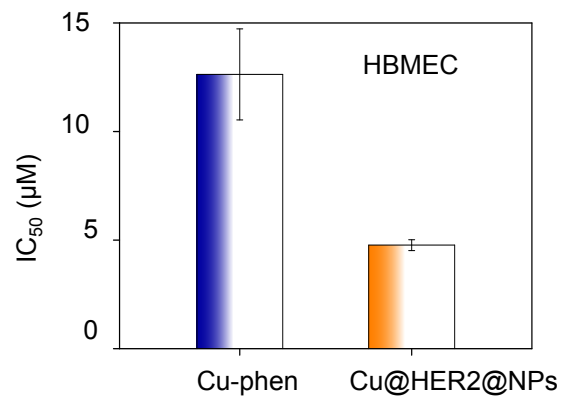

**Figure S4.** Cytotoxic effects of Cu-phen and Cu@HER2@NPs on HBMEC cells after 72 h incubation.
